# Supplementary material
Source: publisher site journal article supplement (https://www.dovepress.com/article/438344)
Supplement: Supplementary file 1 [file get_supplementary_file.php]

Table S1: Chi-square test to assess the association between physical activity and arterial stiffness (based on baPWV and CCA IMT) in patients with T2DM.

|  | **Low physical activity** | **Moderate physical activity** | **High physical activity** | **P value** |
| --- | --- | --- | --- | --- |
| **Arterial stiffness based on baPWV** |  |  |  | 0.007^ |
| Yes | 367 (17.8%) | 429 (20.6%) | 41 (14.1%) |  |
| No | 1699 (82.2%) | 1658 (79.4%) | 250 (85.9%) |  |
| **Arterial stiffness based on CCA IMT** |  |  |  | 0.011^ |
| Yes | 353 (17.1%) | 389 (18.6%) | 34 (11.7%) |  |
| No | 1713 (82.9%) | 1698 (81.4%) | 257 (88.3%) |  |

^Statistically significant

T2DM = type 2 diabetes mellitus; baPWV = brachial-ankle pulse wave velocity; CCA IMT = common carotid artery intima-media thickness
